# Supplementary material for: Phenotyping to predict 12-month health outcomes of older general medicine patients
Source: Springer Nature journal article supplement (doi:10.1007/s40520-024-02924-2), 2025-02-22
Supplement: MOESM10 [file 40520_2024_2924_MOESM10_ESM.pdf]

# ATC-5 drug code clusters

20 Most frequent drugs used for each cluster

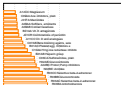

C1: Anticholinergics, bronchodilators, glucocorticoids, PPIs

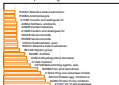

C2: Vit D, PPIs, amphoteric, statins, antihypertensives

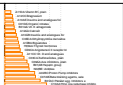

C3: Statins, amphoteric, antihypertensives, PPIs, heparin

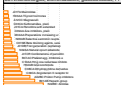

C4: PPIs, heparin, antihypertensives

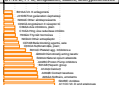

C5: Vit D, laxatives, heparin, PPIs

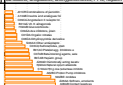

C6: Laxatives, PPIs, statins

Percentage of users
